# Supplementary material
Source: MDPI journal article supplement (https://www.mdpi.com/2076-3417/11/10/4353)
Supplement: s1 [file s1]

## **Supplementary Information**

# **A Multi-Objective Optimization of 2D Materials Modified Surface Plasmon Resonance (SPR) Based Sensors' Response: NSGA II Approach**

**Pericle Varasteanu <sup>1,2\*</sup>, Mihaela Kusko<sup>1</sup>**

<sup>1</sup> National Institute for Research and Development in Microtechnology (IMT-Bucharest), 126A  
Erou Iancu Nicolae Street, 077190 Voluntari, Romania

<sup>2</sup> Faculty of Physics, University of Bucharest, 405 Atomistilor Street, 077125 Magurele,  
Romania

\* Correspondence: [pericle.varasteanu@imt.ro](mailto:pericle.varasteanu@imt.ro);

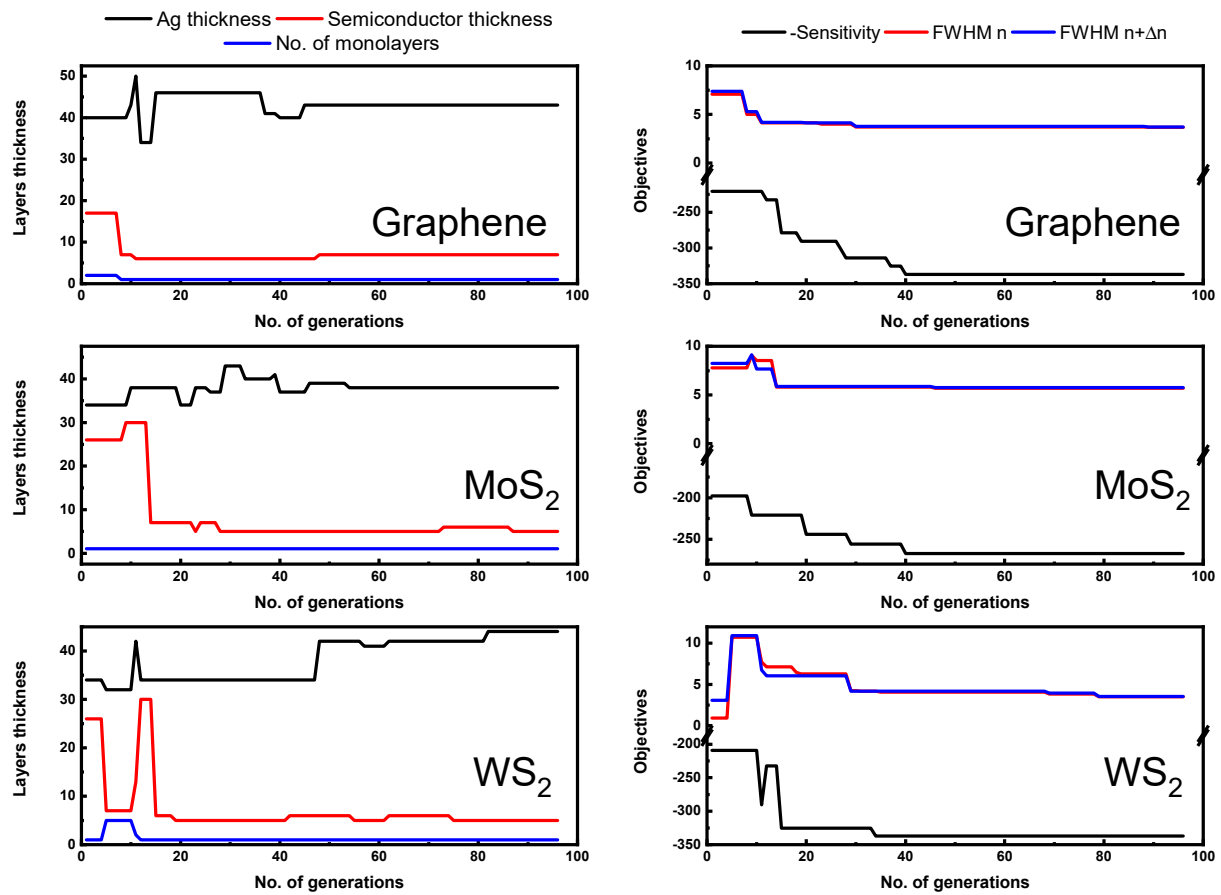

**Figure S1:** Convergence plots for the Ag-Semiconductor-2D material-Sensing medium ( $n_{\text{semiconductor}}$ ) configuration with -sensitivity and FWHM as objectives; Left column: the layers thicknesses convergence and right column: the objectives

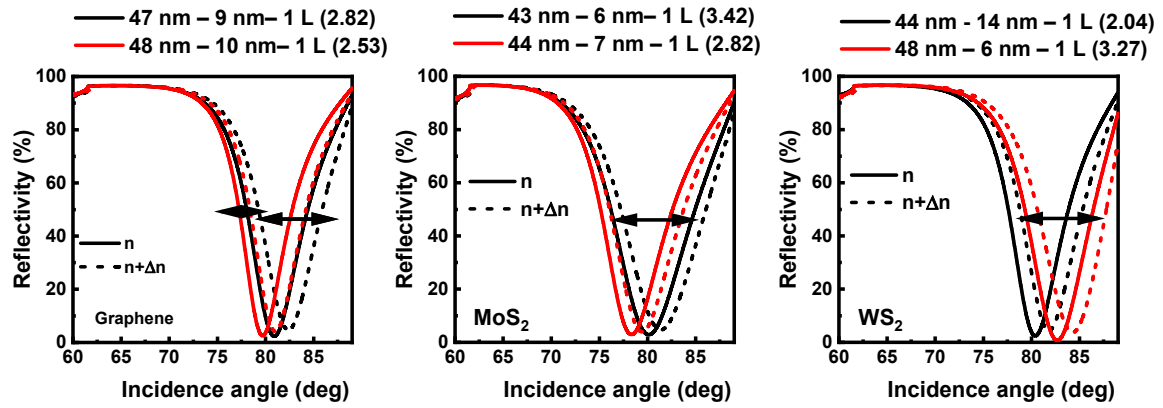

**Figure S2:** Reflectivity curves for the Ag-Semiconductor-2D material-Sensing medium ( $n_{\text{semiconductor}}$ ) configuration

**Table S1:** Additional configurations for the structure: Ag-semiconductor-2D material-Sensing medium

| L.N. | Material         | Configuration: Ag – semiconductor – 2D material -sensing medium – ( $n_{\text{semiconductor}}$ ) | Sensitivity [deg/RIU] | FWHM [deg] |
|------|------------------|--------------------------------------------------------------------------------------------------|-----------------------|------------|
| 1    | Graphene         | 47 nm – 9 nm– 1 L (2.82)                                                                         | 285                   | 5.6        |
| 2    |                  | 48 nm – 10 nm– 1 L (2.53)                                                                        | 250                   | 4.9        |
| 3    | MoS <sub>2</sub> | 43 nm – 6 nm– 1 L (3.42)                                                                         | 250                   | 7.6        |
| 4    |                  | 44 nm – 7 nm – 1 L (2.82)                                                                        | 228                   | 6.6        |
| 5    | WS <sub>2</sub>  | 44 nm - 14 nm – 1 L (2.04)                                                                       | 320                   | 6.4        |
| 6    |                  | 48 nm – 6 nm – 1 L (3.27)                                                                        | 270                   | 5.52       |

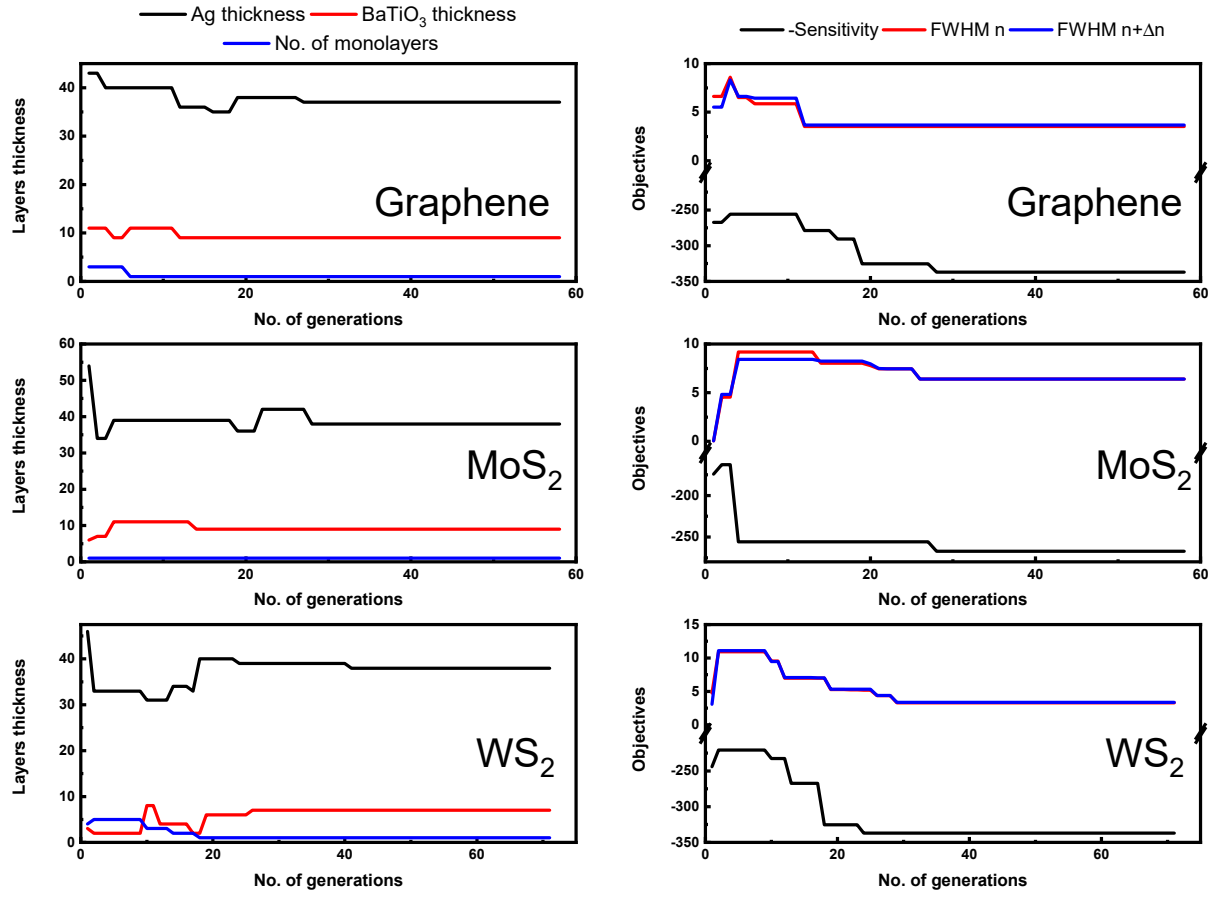

**Figure S3:** Convergence plots for the Ag-BaTiO<sub>3</sub>-2D material-Sensing medium configuration with -sensitivity and FWHM as objectives; Left column: the layers thicknesses convergence and right column: the objectives convergence

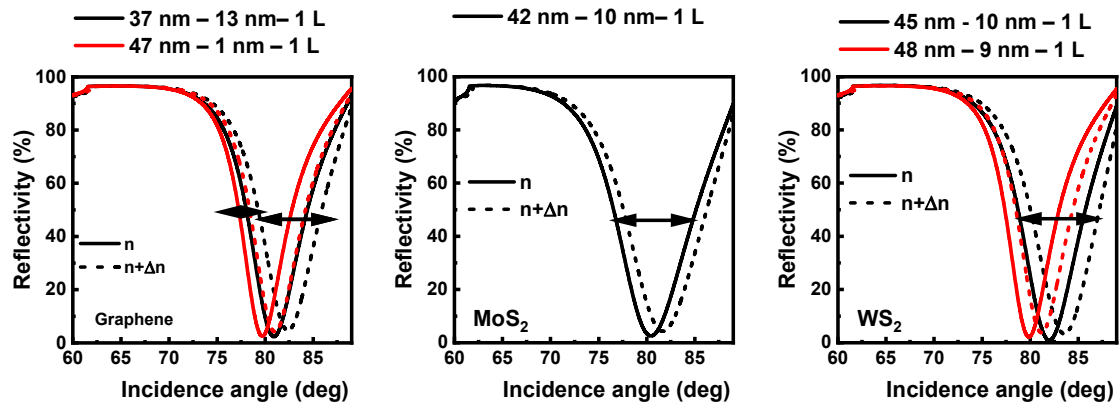

**Figure S4:** Reflectivity curves for the Ag-BaTiO<sub>3</sub>-2D material-Sensing medium configuration

**Table S2:** Additional configurations for the structure: Ag-BaTiO<sub>3</sub>-2D material-Sensing medium

| L.N. | Material         | Configuration: Ag – BaTiO <sub>3</sub> – 2D material<br>-sensing medium | Sensitivity<br>[deg/RIU] | FWHM [deg] |
|------|------------------|-------------------------------------------------------------------------|--------------------------|------------|
| 1    | Graphene         | 37 nm – 13 nm– 1 L                                                      | 315                      | 8          |
| 2    |                  | 47 nm – 1 nm– 1 L                                                       | 257                      | 5.4        |
| 3    | MoS <sub>2</sub> | 42 nm – 10 nm– 1 L                                                      | 250                      | 7.4        |
| 4    | WS <sub>2</sub>  | 45 nm - 10 nm – 1 L                                                     | 310                      | 6.3        |
| 5    |                  | 48 nm – 9 nm – 1 L                                                      | 260                      | 5          |

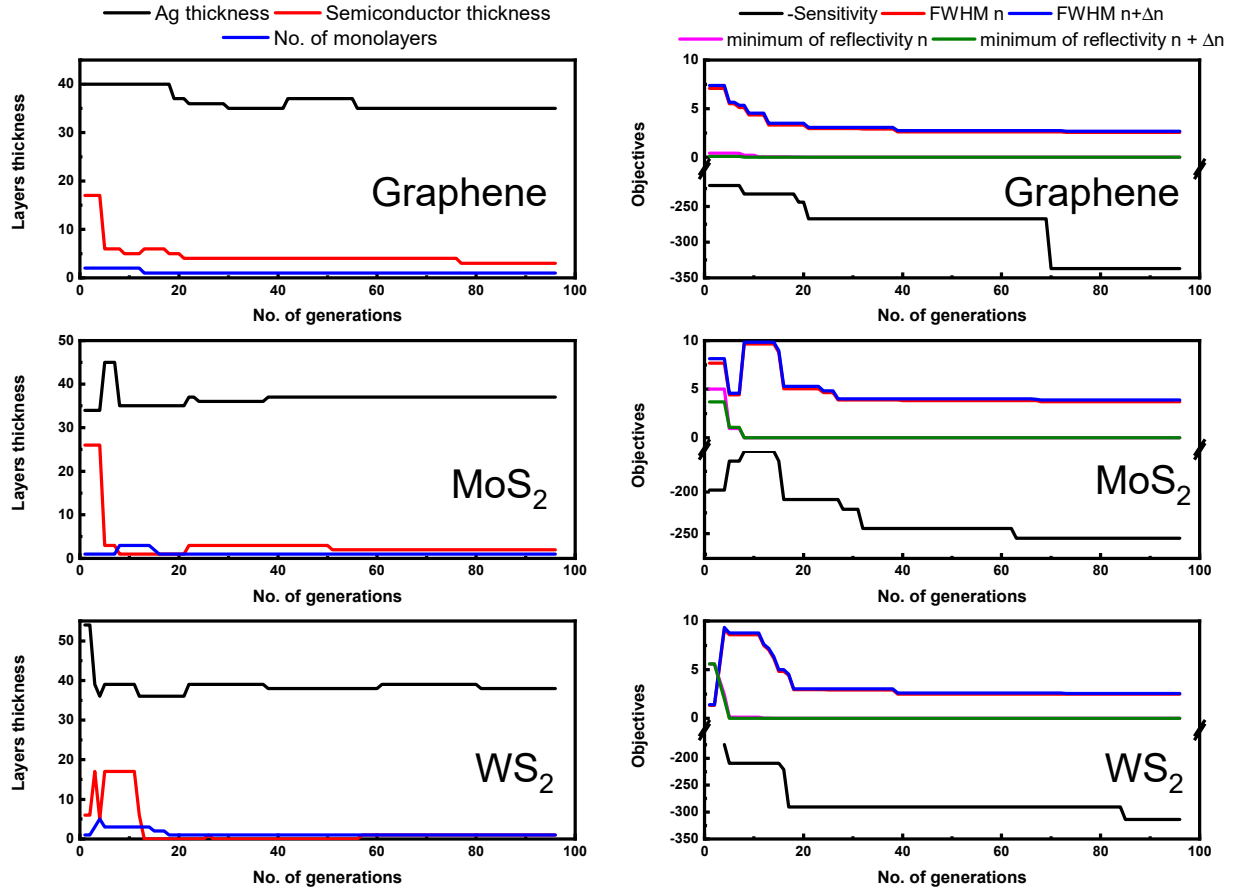

**Figure S5:** Convergence plots for the Ag-Semiconductor-2D material-Sensing medium ( $n_{\text{semiconductor}}$ ) configuration with -sensitivity, FWHM, and minimum of reflectivity as objectives; Left column: the layers thicknesses convergence and right column: the objectives convergence

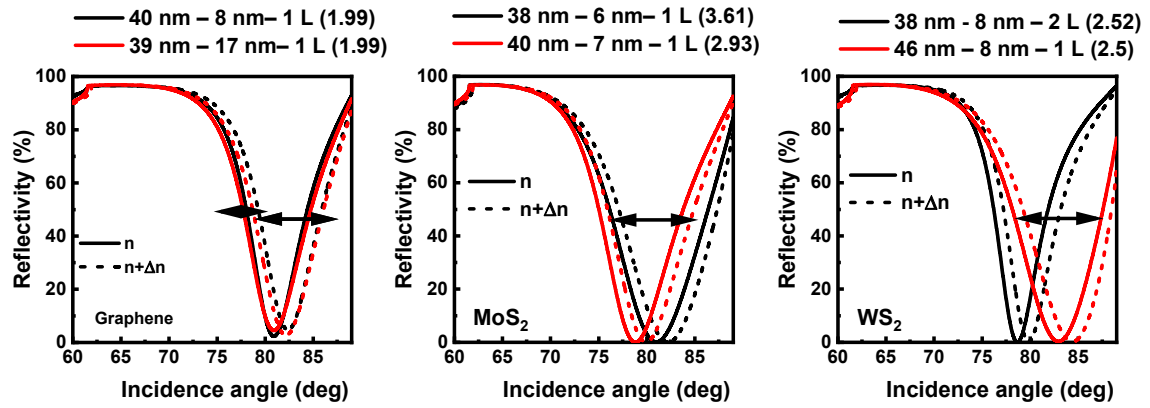

**Figure S6:** Reflectivity curves for the Ag-Semiconductor-2D material-Sensing medium ( $n_{\text{semiconductor}}$ ) configuration with -sensitivity, FWHM, and minimum of reflectivity as objectives;

**Table S3:** Additional configurations for the structure: Ag-Semiconductor- 2D material-Sensing medium

| L.N. | Material         | Configuration: Ag – semiconductor – 2D material -sensing medium – ( $n_{\text{semiconductor}}$ ) | Sensitivity [deg/RIU] | FWHM [deg] |
|------|------------------|--------------------------------------------------------------------------------------------------|-----------------------|------------|
| 1    | Graphene         | 40 nm – 8 nm– 1 L (1.99)                                                                         | 285                   | 7.5        |
| 2    |                  | 39 nm – 17 nm– 1 L (1.99)                                                                        | 260                   | 8.3        |
| 3    | MoS <sub>2</sub> | 38 nm – 6 nm– 1 L (3.61)                                                                         | 235                   | 10         |
| 4    |                  | 40 nm – 7 nm – 1 L (2.93)                                                                        | 218                   | 8.66       |
| 5    | WS <sub>2</sub>  | 38 nm - 8 nm – 2 L (2.52)                                                                        | 280                   | 9          |
| 6    |                  | 46 nm – 8 nm – 1 L (2.5)                                                                         | 235                   | 5.7        |

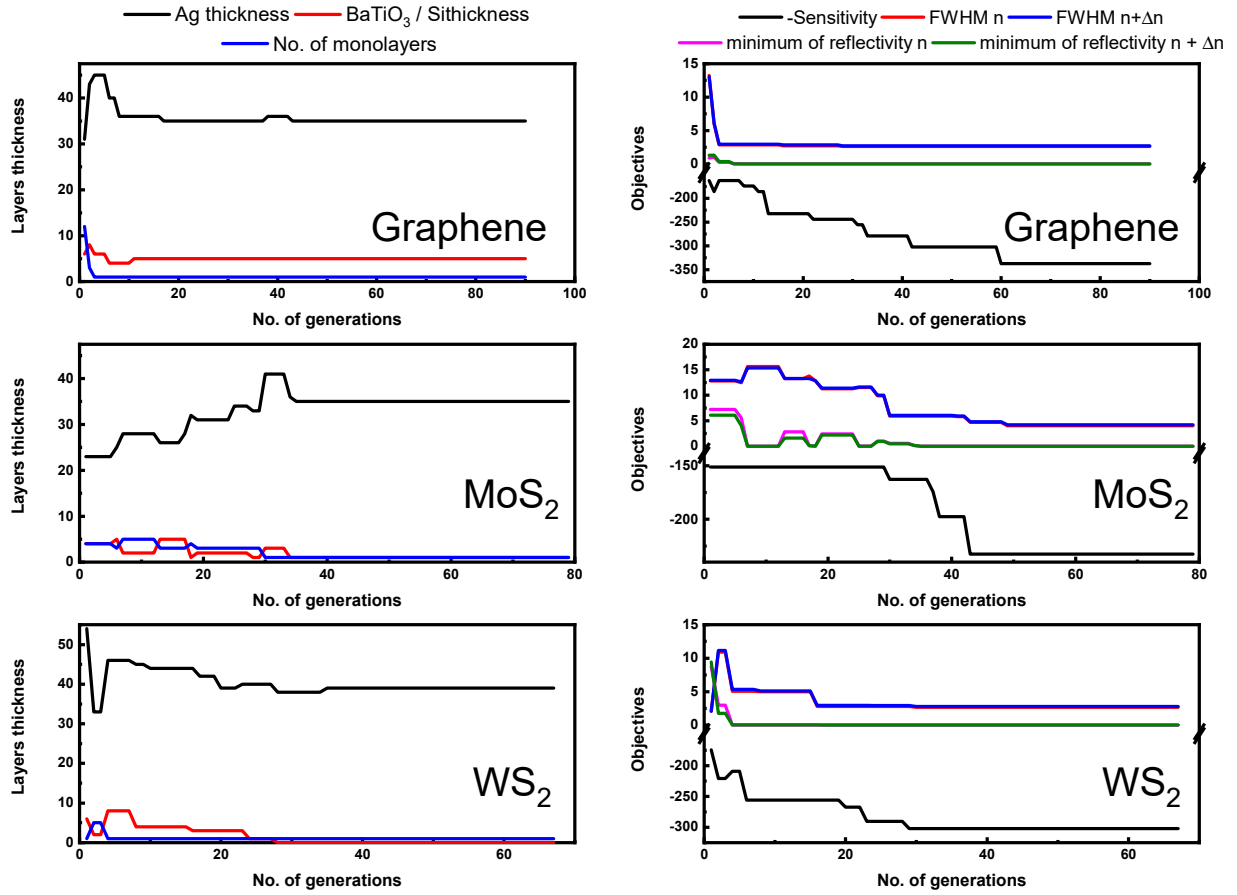

**Figure S7:** Convergence plots for the Ag-BaTiO<sub>3</sub>/Si-2D material-Sensing medium configuration with -sensitivity, FWHM, and minimum of reflectivity as objectives; Left column: the layers thicknesses convergence and right column: the objectives convergence



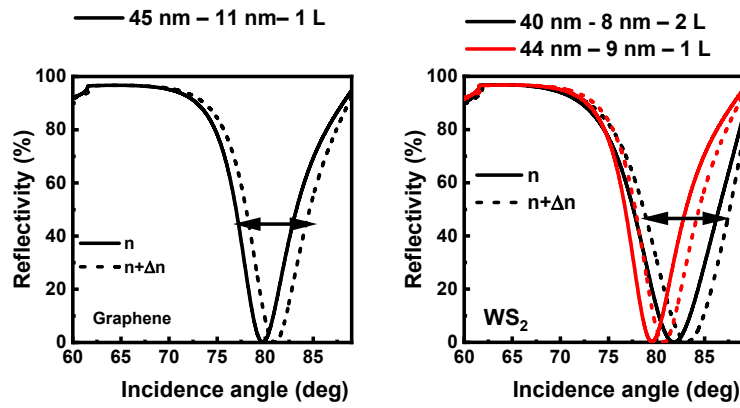

**Figure S8:** Reflectivity curves for the Convergence plots for the Ag-BaTiO<sub>3</sub>/Si-2D material-Sensing medium configuration with -sensitivity, FWHM, and minimum of reflectivity as objectives

**Table S4:** Additional configurations for the structure: Ag-BaTiO<sub>3</sub>-2D material-Sensing medium

| L.N. | Material         | Configuration: Ag – BaTiO <sub>3</sub> /Si – 2D material -sensing medium | Sensitivity [deg/RIU] | FWHM [deg] |
|------|------------------|--------------------------------------------------------------------------|-----------------------|------------|
| 1    | Graphene         | 45 nm – 11 nm– 1 L (BaTiO <sub>3</sub> )                                 | 250                   | 6.1        |
| 2    |                  | 44 nm – 11 nm– 1 L (BaTiO <sub>3</sub> )                                 | 235                   | 6.3        |
| 3    | MoS <sub>2</sub> | -                                                                        | -                     | -          |
| 4    |                  | -                                                                        | -                     | -          |
| 5    | WS <sub>2</sub>  | 40 nm - 8 nm – 2 L (BaTiO <sub>3</sub> )                                 | 270                   | 8.66       |
| 6    |                  | 44 nm – 9 nm – 1 L (BaTiO <sub>3</sub> )                                 | 240                   | 6.5        |
